# Supplementary material
Source: MDPI journal article supplement (https://www.mdpi.com/2673-4095/2/2/21)
Supplement: s1 [file s1]

### **Interview Schedule**

Introduction (warm-up): Could you give me a brief summary of your journey from the time you were referred to bariatric surgery assessment to having bariatric surgery?

- A. Knowledge/understanding of pre-surgery evaluation (PSE)
  - 1. What was your understanding of the PSE at the of referral?
    - Prompts: After you were referred, before your very first meeting with... ?
  - 2. Where did you get your knowledge from?
    - Prompts: family, friends, support groups, organisations, Internet, GP, service/team
  - 3. Prior to the evaluation, were you given any information by the bariatric specialist health professionals provide you with about the PSE?
    - Prompts: Meetings, content explored, reason, rationale...
  - 4. Currently, what do you think of your understanding/knowledge of the PSE and the information provided by health professionals?
    - Prompts: Now that you've gone through the process, do you feel you had 1) sufficient information, 2) accurate information, 3) relevant and meaningful information, 4) impactful?
- B. Expectations of the PSE
  - 1. At the time of referral, what were your expectations of the PSE process?
    - Prompts: Before your very first meeting, before each meeting... anxieties? Worries? Thoughts? Beliefs
  - 2. What were your expectations based on?
    - Prompts: where did these come from?
  - 3. Did your expectations of the PSE process change over time? If so, how?
    - Prompts: After meeting the GP, surgeon, dietitian, support group etc.
  - 4. Currently, do you have any thoughts about your role and the professionals' role in managing expectations of the PSE process?
    - Prompts: Do you think you should have done something differently so that you were happy about your expectations? Do you think the service should have done something differently?
- C. Preparation for/Coping with the PSE?
  - 1. How much did you think about the PSE process?
    - Prompts: before and after the PSE; per day, per week, per month?
  - 2. How did you deal with the PSE process?
    - Prompts: Help from professionals, Support group, family, friends, any other sources, dealing with different meetings?
  - 3. Currently, what do you think of your preparation for and coping with the PSE?
    - Did you prepare? Was it enough? Did you wish you had done something differently?
- D. Experience and impact of the PSE?
  - 1. Could you describe what happens in the PSE (and tier 3)?
    - Prompts: pre-surgery weight management scheme
  - 2. Could you describe how you experienced the PSE/tier 3 process, in your own words?

- Encouraging, supportive, learning experience, helpful/useful, difficult, tiring, anxiety, frustration, unnecessary, unfair
- 3. How did you feel about the PSE process?
  - Prompts: mentally, physically, emotionally
- 4. What did you think about the PSE process?
  - Prompts: Opinions, feelings, thoughts, feedback?
- 5. Did the process affect your and if so how:
  - Prompts: knowledge/understanding, expectations, preparation everyday life
